# Supplementary material for: On the hydrothermal stability of MCM-41 mesoporous silica nanoparticles and the preparation of luminescent materials
Source: Royal Society of Chemistry journal article supplement (doi:10.1039/c0jm00559b), 2010-01-01
Supplement: c0jm00559b.pdf [file c0jm00559b.pdf]

## Supplementary Material

### **On the Hydrothermal Stability of MCM-41 Mesoporous Silica Nanoparticles and the Preparation of Luminescent Materials.**

Fabio Carniato,<sup>a</sup> Chiara Bisio,<sup>a</sup> Geo Paul,<sup>a</sup> Giorgio Gatti,<sup>a</sup> Luca Bertinetti,<sup>b</sup> Salvatore Coluccia<sup>b</sup> and  
Leonardo Marchese<sup>a\*</sup>

<sup>a</sup> Dipartimento di Scienze e Tecnologie Avanzate and Nano-SISTEMI Interdisciplinary Centre, Università del Piemonte Orientale “A. Avogadro” V. Teresa Michel 11, 15121, Alessandria (Italy).

Fax: +390131360250 E-mail: [leonardo.marchese@mfn.unipmn.it](mailto:leonardo.marchese@mfn.unipmn.it)

<sup>b</sup> Dipartimento di Chimica IFM and NIS Centre of Excellence Università di Torino Via Pietro Giuria 7, 10125 Torino (Italy).

#### **Contents**

##### **1. Figures**

## 1. Figures

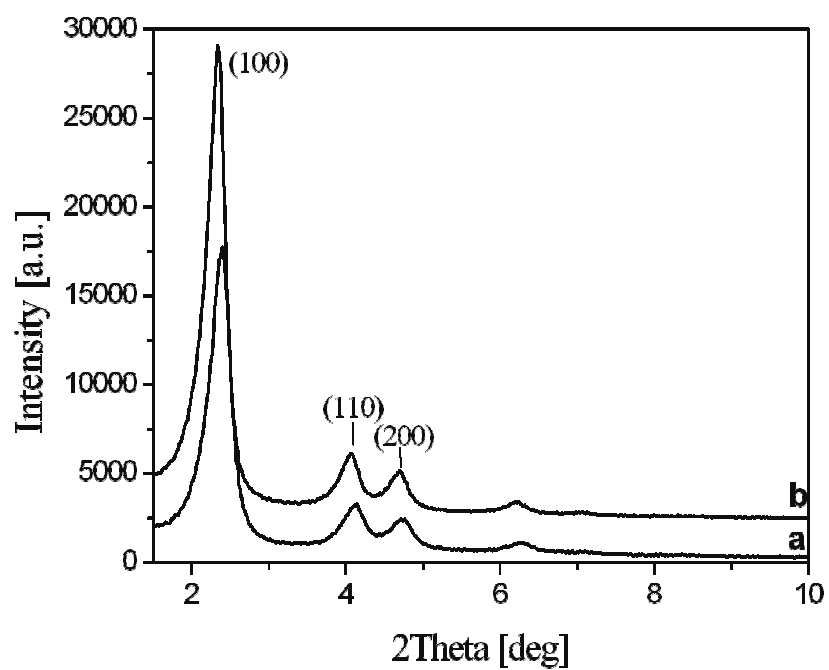

Figure S1: XRD profiles of MCM-41 (a) and MCM-41(st) (b).

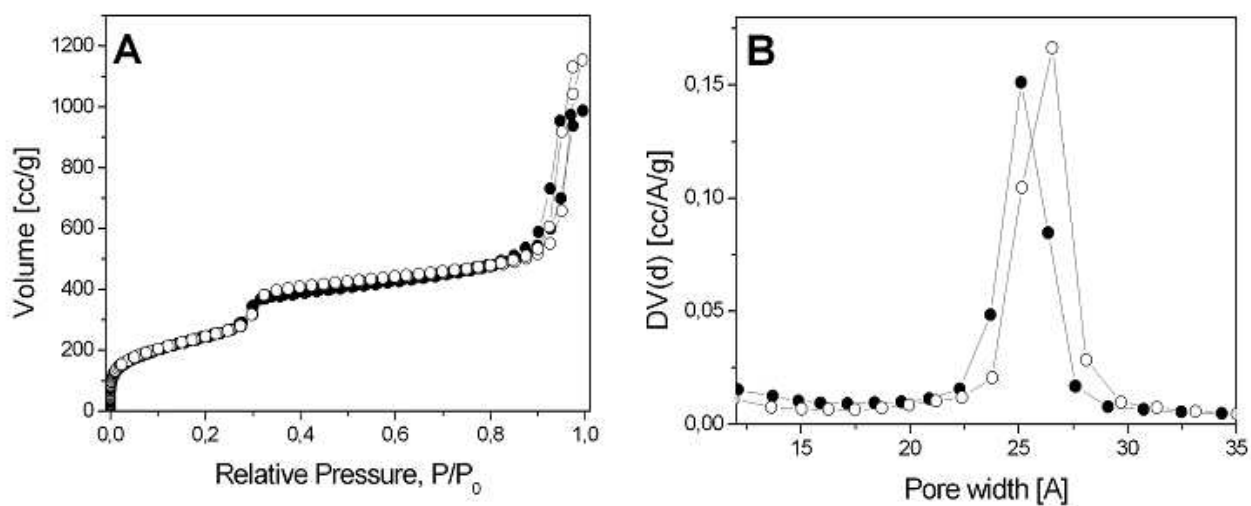

Figure S2: A) N<sub>2</sub> adsorption/desorption isotherms at 77 K of MCM-41 (-●-) and MCM-41(st) (-○-). Pores size distributions obtained by BJH are reported in B); MCM-41 (-●-) and MCM-41(st) (-○-).

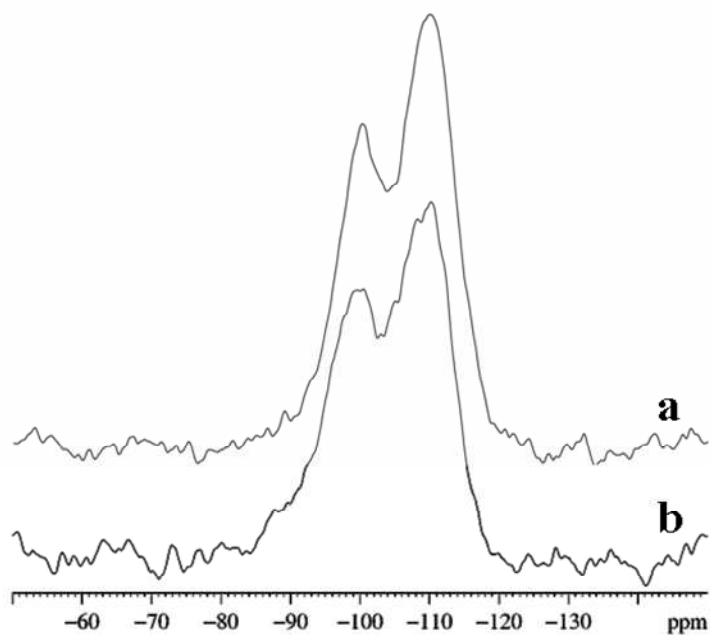

Figure S3:  $^{29}\text{Si}$  NMR spectra of MCM-41 (a) and MCM-41(st) (b) before calcination.

Table 1. Relative ratio of populations of the partially and fully condensed silicon sites  $(\text{Q}^3+\text{Q}^2)/\text{Q}^4$  for MCM-41 and MCM-41(st) before calcination.

|                                      | <b>MCM-41</b> | <b>MCM-41(st)</b> |
|--------------------------------------|---------------|-------------------|
| $(\text{Q}^3+\text{Q}^2)/\text{Q}^4$ | 0.70          | 1.20              |

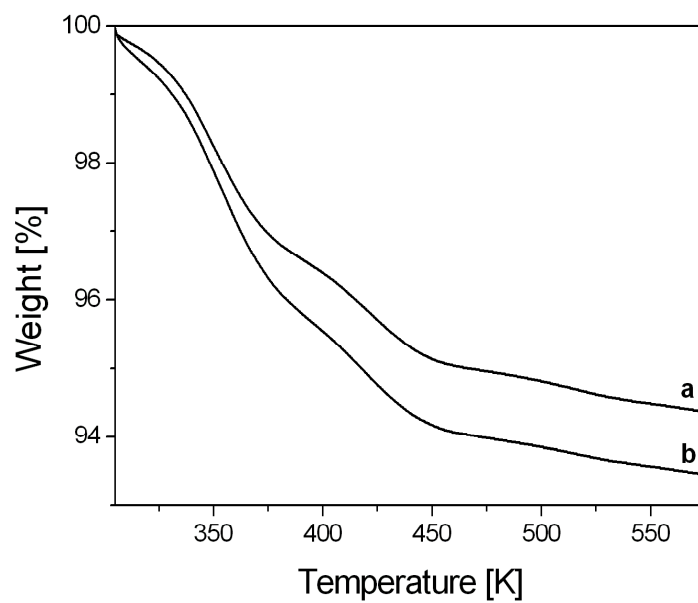

Figure S4: TGA profiles under Argon flow (rate 5 K/min) of calcined MCM-41 (curve b) and MCM-41(st) (curve a).

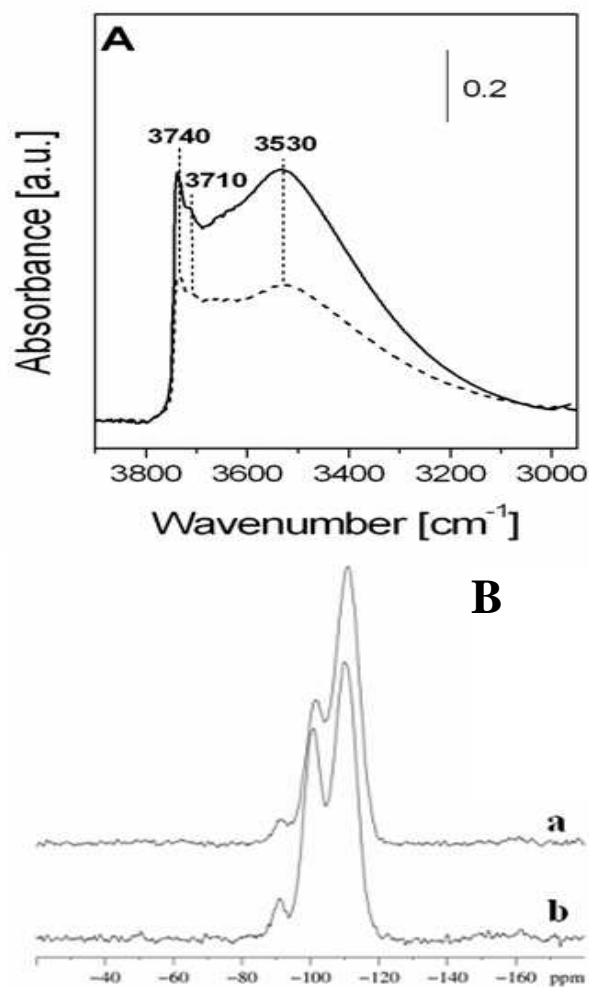

Figure S5: A) IR spectra under vacuum conditions of calcined MCM-41 (dotted line) and MCM-41(st) (solid line) after hydrothermal treatment at 323 K. B) <sup>29</sup>Si NMR spectra of MCM-41 (a) and MCM-41(st) (b) after hydrothermal treatment at 323 K for 20 h.

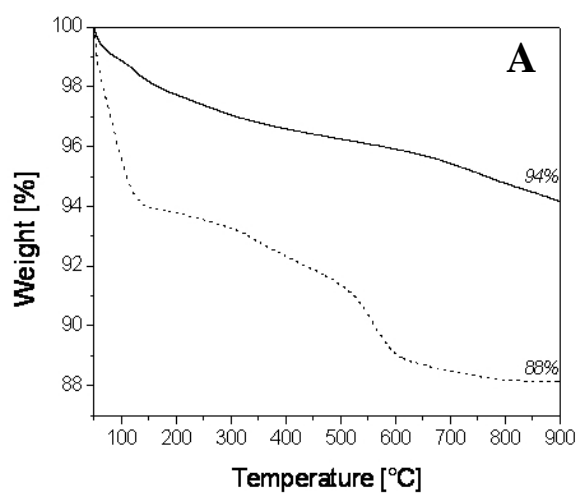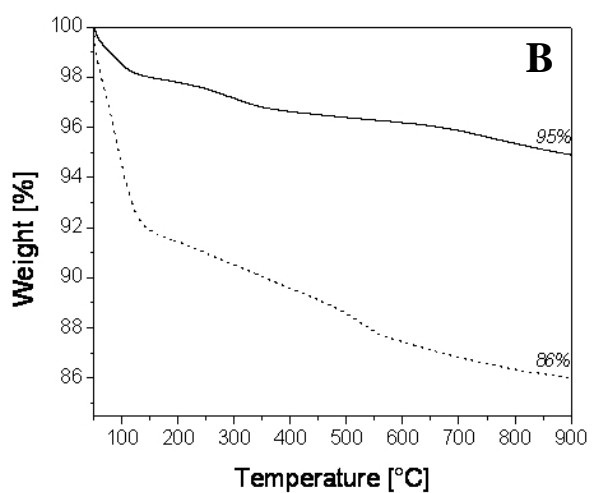

Figure S6: TGA profiles collected under oxygen flow of: A) MCM-41 (solid line) and F/MCM-41 (short dash line); B) MCM-41(st) (solid line) and F/MCM-41(st) (short dash line).

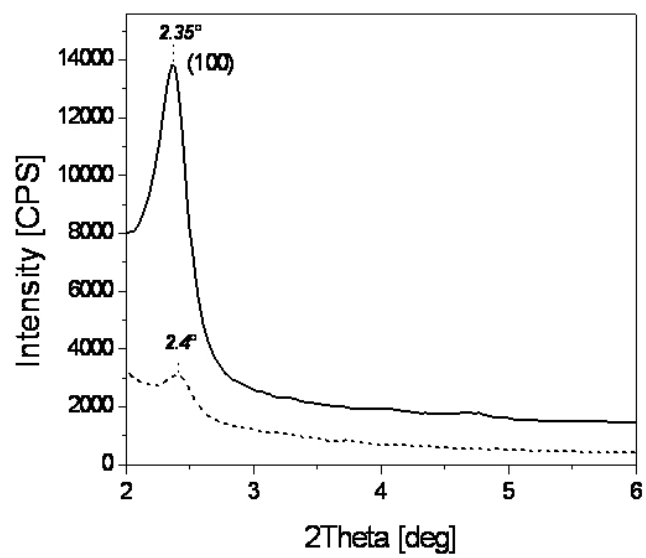

Figure S7: XRD profiles of F/MCM-41 (short dash line) and F/MCM-41(st) (solid line).
